# Supplementary material for: Extraordinary cycling performance of high-voltage spinel LiNi0.5Mn1.5O4 materials enabled by interfacial engineering via molecular self-assembly
Source: Royal Society of Chemistry journal article supplement (doi:10.1039/d4ta02334j), 2024-01-01
Supplement: d4ta02334j1.pdf [file d4ta02334j1.pdf]

Supporting Information

**Extraordinary Cycling Performance of High-Voltage Spinel  
LiNi<sub>0.5</sub>Mn<sub>1.5</sub>O<sub>4</sub> Materials Enabled by Interfacial Engineering via  
Molecule Self-Assembly**

*Chao Zhang<sup>a</sup>, Jing-Zhe Wan<sup>a</sup>, Liang Gao<sup>a</sup>, Zhi-Peng Cai<sup>a</sup>, Chao Ma<sup>b</sup>, Kai-Xue  
Wang<sup>a\*</sup> and Jie-Sheng Chen<sup>a\*</sup>*

*<sup>a</sup>School of Chemistry and Chemical Engineering, Shanghai Jiao Tong University,  
Shanghai, P. R. China*

*<sup>b</sup>College of Smart Energy, Shanghai Jiao Tong University, Shanghai, P. R. China*

*\*Correspondence: Kai-Xue Wang, Jie-Sheng Chen*

*E-mail: k.wang@sjtu.edu.cn, chemcj@sjtu.edu.cn*

**Table S1** Nyquist plots fitting data for LNMO and LNMO-DA

|                       | LNMO  | LNMO             | LNMO-DA | LNMO-DA          |
|-----------------------|-------|------------------|---------|------------------|
|                       | Fresh | After 500 cycles | Fresh   | After 500 cycles |
| $R_s$ ( $\Omega$ )    | 2.56  | 3.487            | 2.68    | 3.11             |
| $R_{ct}$ ( $\Omega$ ) | 132.1 | 81.06            | 131.6   | 15.18            |

DA: decanoic acid

The X-ray Photoelectron Spectroscopy (XPS) analysis has been incorporated into our experimental procedures. However, it was observed that the LNMO-DA material, which contains a mere increment of 0.2 wt% of DA relative to the LNMO material, exhibits no discernible alterations in the Ni 2p, Mn 2p, and C1s spectra before cycling (Fig. S1a-c).

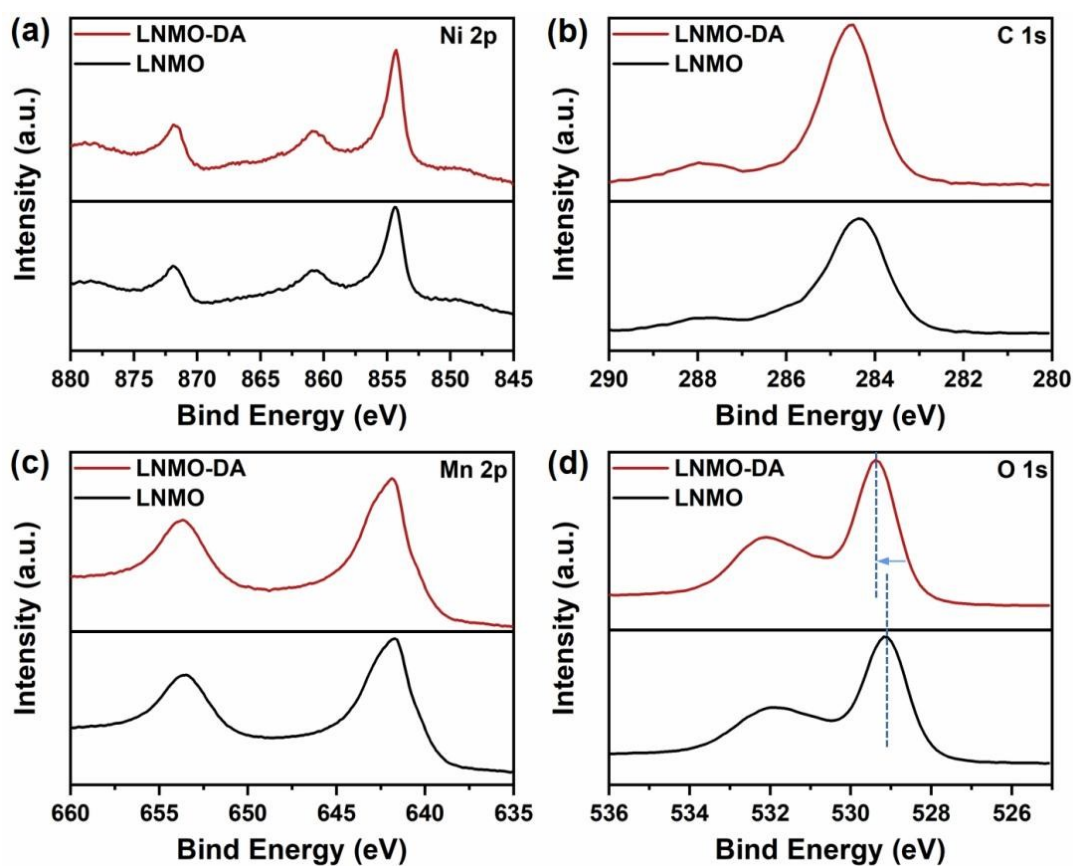**Fig. S1** (a) Ni 2p, (b) C1s, (c) Mn 2p and (d) O1s Spectra of LNMO and LNMO-DA.

**Thermogravimetric analysis of LNMO and LNMO-DA materials.** The actual weight of DA coating on the LNMO was revealed by the thermogravimetric analysis. As shown in [Figures S2](#), the surface DA started to decompose at about 100 °C. According to the thermogravimetric results, the mass of the DA monolayer on the LNMO surface is approximately 0.2%.

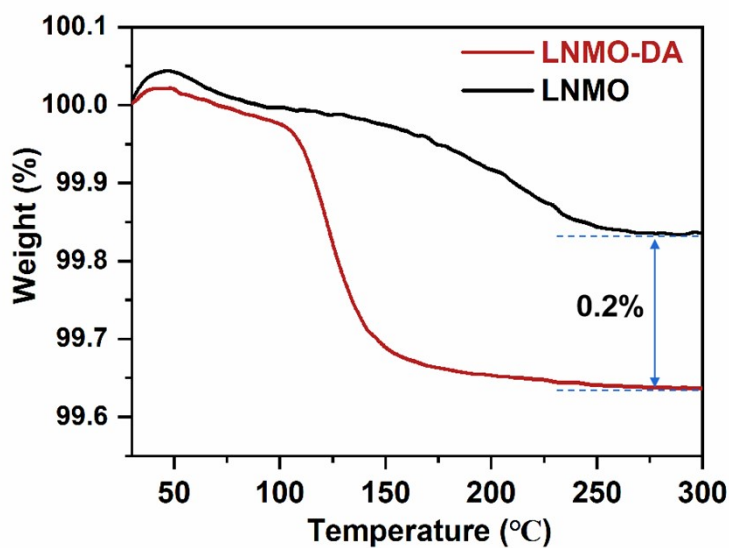

**Fig. S2** Thermogravimetric curves of LNMO and LNMO-DA materials.

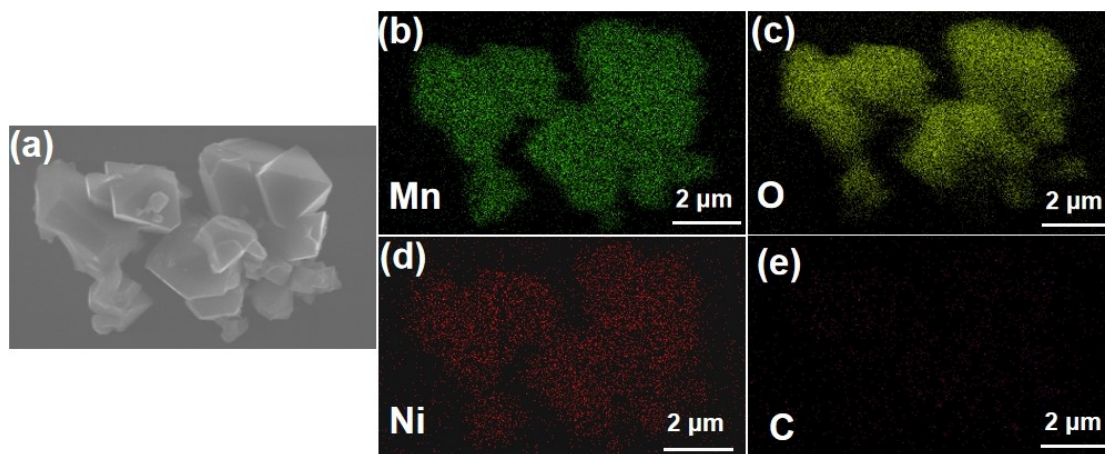

**Fig. S3** Elemental mapping of LNMO showing the homogeneous distribution of Mn, Ni, O, and C elements.

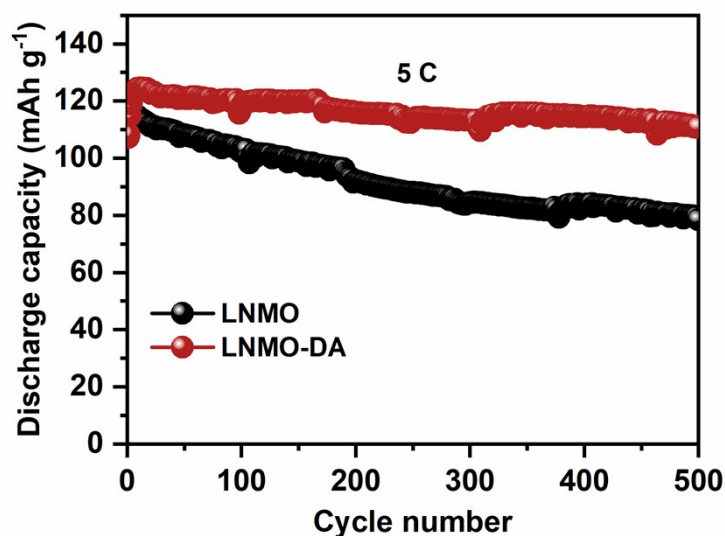

Fig. S4 Rate performance of LNMO and LNMO-DA at 5 C.

The specific proportion of pseudo-capacitance behavior contribution is evaluated by the following formula<sup>[1]</sup>:

$$i(v) = k_1v + k_2v^{1/2}$$

where  $k_1v$  and  $k_2v^{1/2}$  represent the contributions of the pseudo-capacitance process and the diffusion process, respectively. Significantly, LNMO-DA demonstrates an elevated ratio of pseudo-capacitance, stemming from the electrode surface's concentration of reaction sites. Relative to LNMO, LNMO-DA's pseudo-capacitive lithium retention mechanism inflicts less structural degradation. This approach enhances the material's cycling stability and boosts the efficiency of charge/discharge cycles, particularly under high current conditions as depicted in Fig. S4. This pseudo-capacitance mechanism in LNMO-DA expedites carrier transport, ensuring superior rate capability and prolonged cycling life, alongside structural integrity.

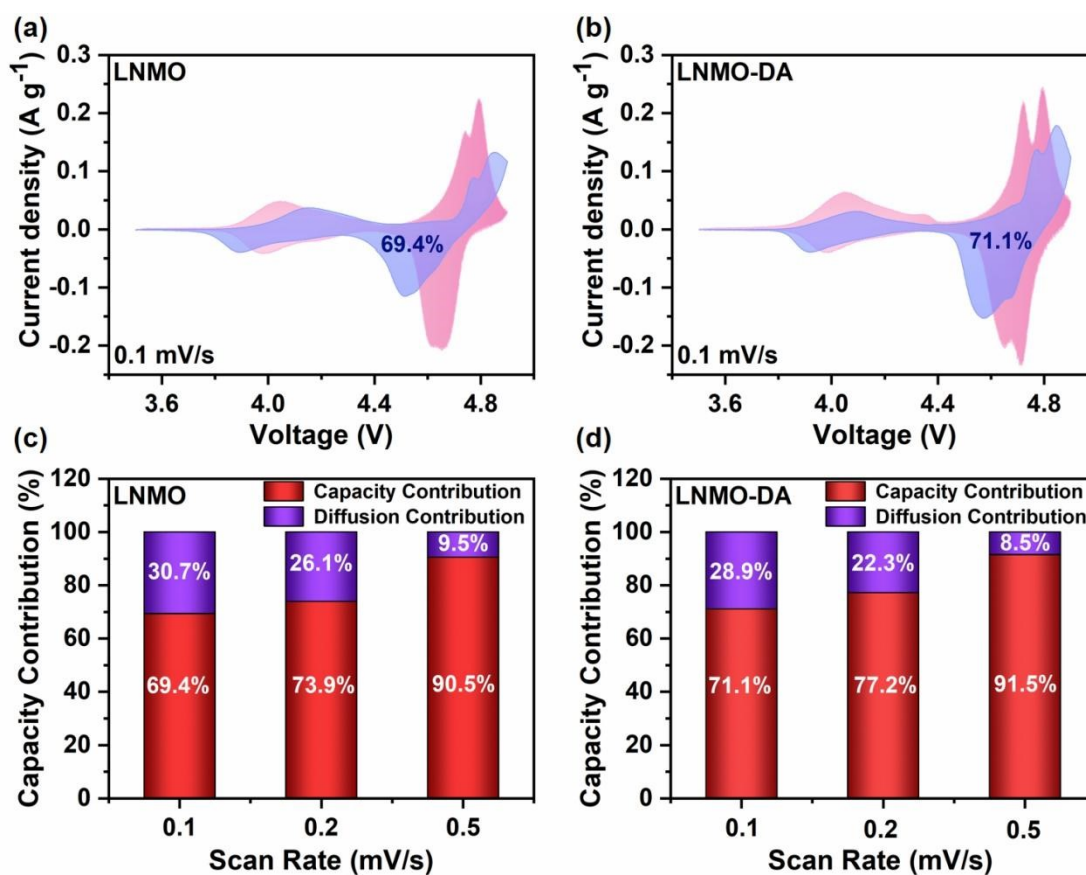

**Fig. S5** Capacitive contribution at  $0.1 \text{ mV s}^{-1}$  of (a) LNMO and (b) LNMO-DA. Contribution proportions of capacitive behavior and diffusion for (a) LNMO and (b) LNMO-DA at different scan rates.

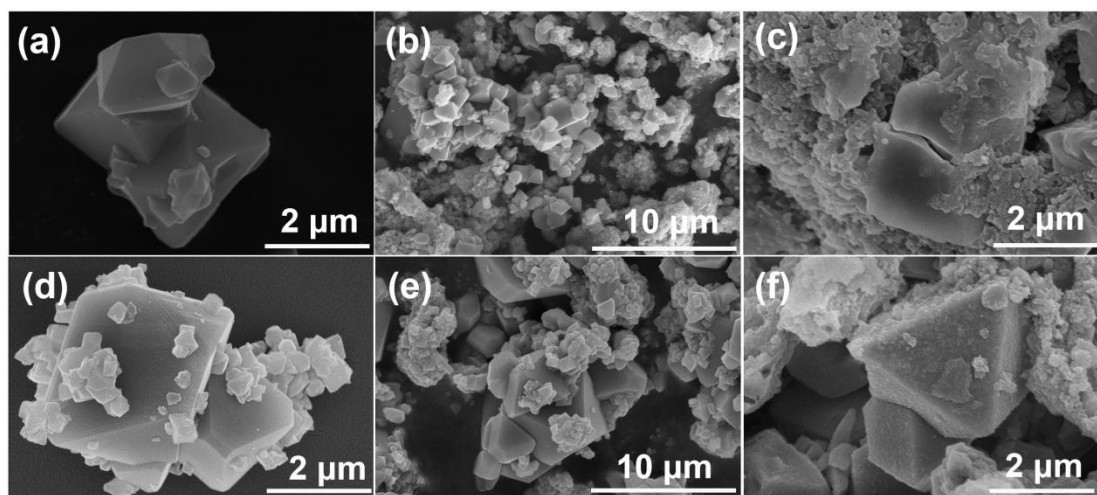

**Fig. S6** SEM images of (a,b) LNMO and (d,e) LNMO-DA before cycling. SEM images with low magnification of (c) LNMO and (f) LNMO-DA after cycling.

1. X. Xu, Q. Liu, H. Zhu, S. Cao and Y. Liu, *ACS Sustainable Chem. Eng.*, 2023, **11**, 15006–15019.
